# Supplementary material
Source: PubMed Central journal article supplement (PMC4198039)
Supplement: embr0015-0956-sd1.pdf [file embr0015-0956-sd1.pdf]

**A**

siCTRL

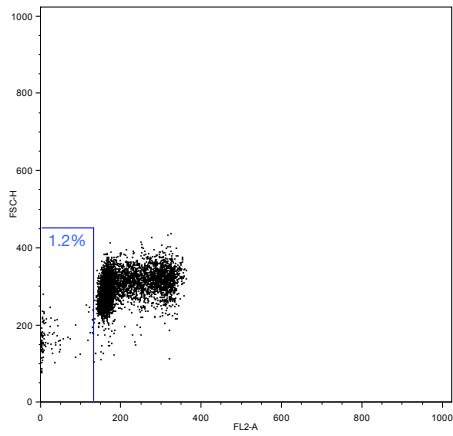

siUBL5(#57)

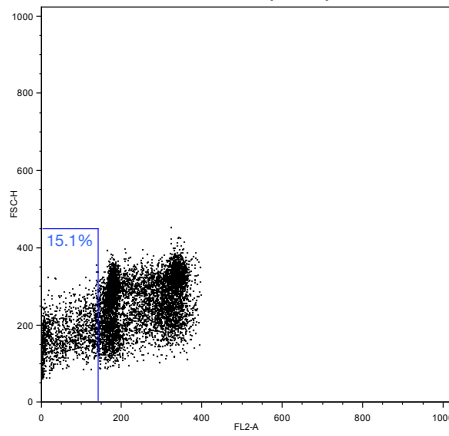

siUBL5(#58)

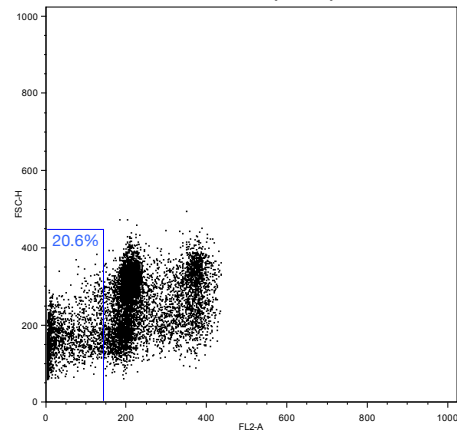**B**

siCTRL

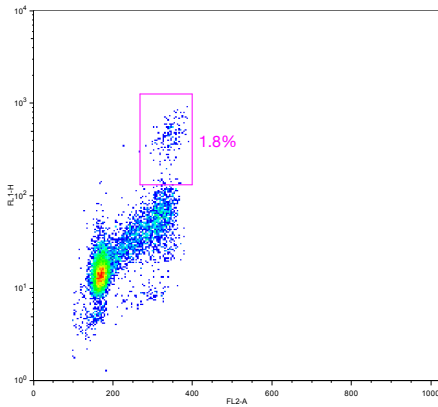

siUBL5(#57)

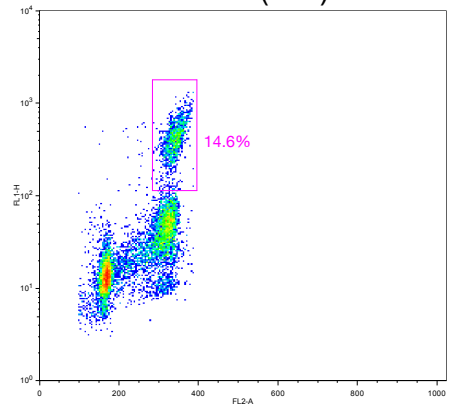

siUBL5(#57) + siBubR1

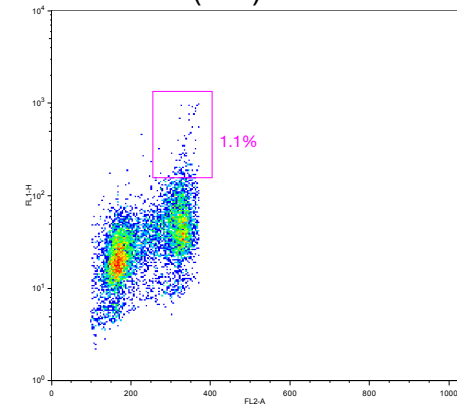**C**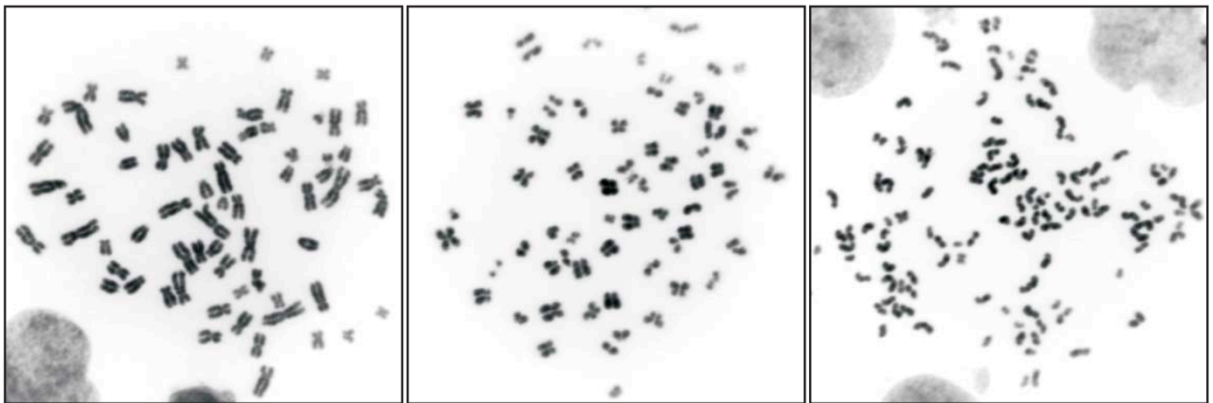**Normal****Apart****Fully separated**

|              |       |       |       |
|--------------|-------|-------|-------|
| siCTRL:      | 100%  | 0%    | 0%    |
| siUBL5(#58): | 31.8% | 24.4% | 43.8% |
| siSCC1:      | 64.3% | 22.6% | 13.1% |
