# Supplementary material
Source: PubMed Central journal article supplement (PMC4198039)
Supplement: embr0015-0956-sd4.pdf [file embr0015-0956-sd4.pdf]

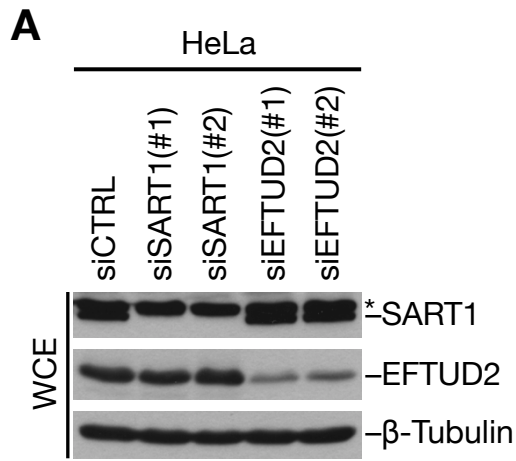

**B**

|          | Gene     | nuclei stay close together | strange nuclear shape | segregation problems | cell migration | metaphase delay | cell death | metaphase alignment problems | pulsating nuclei | small nucleus | prometaphase delay | condensation followed by decondensation without completion of mitosis | large nucleus | failure in decondensation | condensation without mitosis | binuclear | polylobed | large | dynamic changes | mitotic delay | grape |
|----------|----------|----------------------------|-----------------------|----------------------|----------------|-----------------|------------|------------------------------|------------------|---------------|--------------------|-----------------------------------------------------------------------|---------------|---------------------------|------------------------------|-----------|-----------|-------|-----------------|---------------|-------|
| Splicing | SART1    | +                          | +                     | -                    | -              | +               | -          | +                            | -                | -             | -                  | -                                                                     | -             | -                         | -                            | -         | +         | -     | -               | +             | +     |
|          | UBL5     | -                          | +                     | +                    | -              | -               | +          | +                            | -                | -             | -                  | -                                                                     | -             | -                         | -                            | -         | +         | -     | -               | +             | +     |
|          | MFAP1    | -                          | +                     | -                    | -              | +               | +          | +                            | -                | -             | -                  | -                                                                     | -             | -                         | -                            | -         | +         | -     | -               | +             | +     |
|          | WBP11    | -                          | -                     | -                    | -              | -               | -          | -                            | -                | -             | -                  | -                                                                     | -             | -                         | -                            | -         | -         | -     | -               | -             | -     |
|          | PRPF38A  | -                          | -                     | -                    | -              | -               | -          | -                            | -                | -             | -                  | -                                                                     | -             | -                         | -                            | -         | -         | -     | -               | -             | -     |
|          | EFTUD2   | -                          | +                     | -                    | -              | -               | -          | +                            | -                | -             | -                  | -                                                                     | -             | -                         | -                            | +         | +         | -     | -               | +             | +     |
|          | SNRPD1   | -                          | -                     | -                    | -              | -               | -          | -                            | -                | -             | -                  | -                                                                     | -             | -                         | -                            | -         | -         | -     | -               | -             | -     |
|          | PRPF8    | -                          | +                     | +                    | -              | +               | +          | +                            | -                | -             | -                  | -                                                                     | -             | -                         | -                            | -         | +         | -     | -               | +             | +     |
|          | SNRPD3   | -                          | -                     | -                    | -              | -               | -          | -                            | -                | -             | -                  | -                                                                     | -             | -                         | -                            | -         | -         | -     | -               | -             | -     |
|          | Cohesion | SMC1A                      | -                     | +                    | -              | -               | -          | -                            | +                | -             | -                  | -                                                                     | -             | -                         | -                            | -         | -         | +     | -               | -             | +     |
| SMC3     |          | +                          | +                     | +                    | -              | -               | -          | -                            | -                | -             | -                  | -                                                                     | -             | -                         | -                            | -         | -         | -     | -               | -             | -     |
| RAD21    |          | -                          | +                     | +                    | -              | -               | -          | +                            | -                | -             | -                  | +                                                                     | -             | -                         | -                            | -         | +         | -     | +               | +             | -     |
| CDCA5    |          | -                          | +                     | +                    | -              | -               | -          | +                            | -                | -             | -                  | -                                                                     | -             | -                         | -                            | -         | +         | -     | -               | +             | +     |
| SGOL1    |          | +                          | +                     | +                    | -              | -               | -          | +                            | -                | -             | +                  | -                                                                     | -             | -                         | -                            | -         | +         | -     | -               | +             | +     |
