# Supplementary material
Source: PubMed Central journal article supplement (PMC4198039)

**A**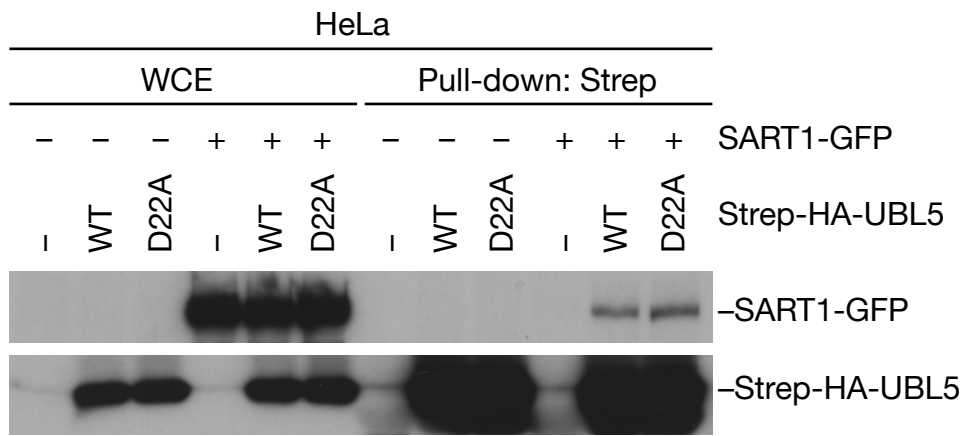**B**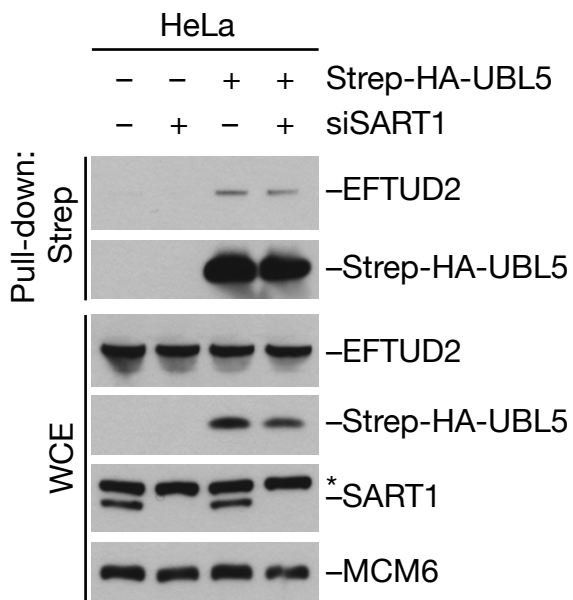**C**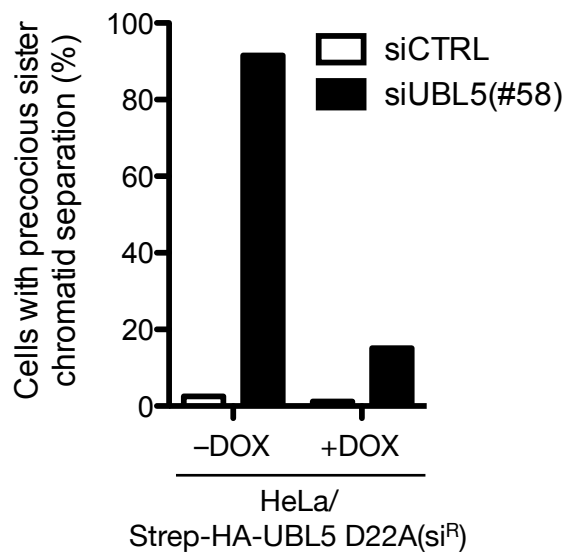

Supplement: embr0015-0956-sd2.pdf [file embr0015-0956-sd2.pdf]

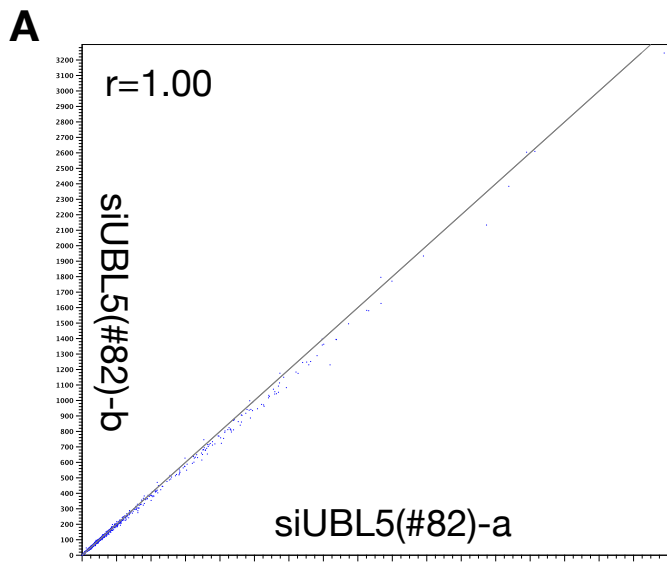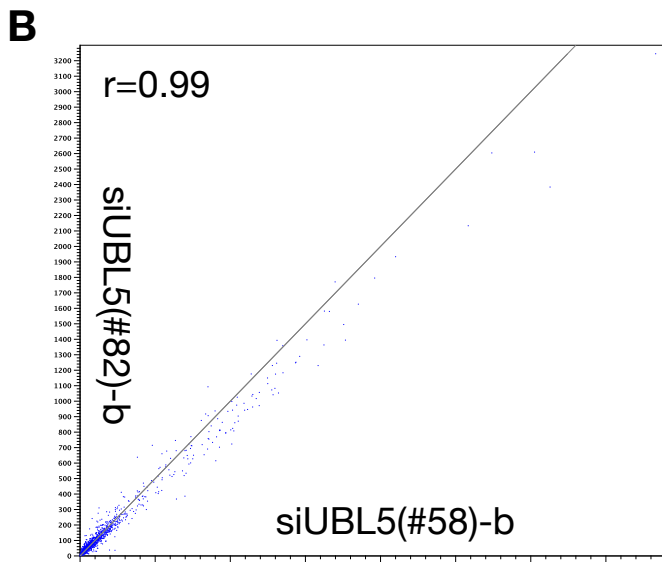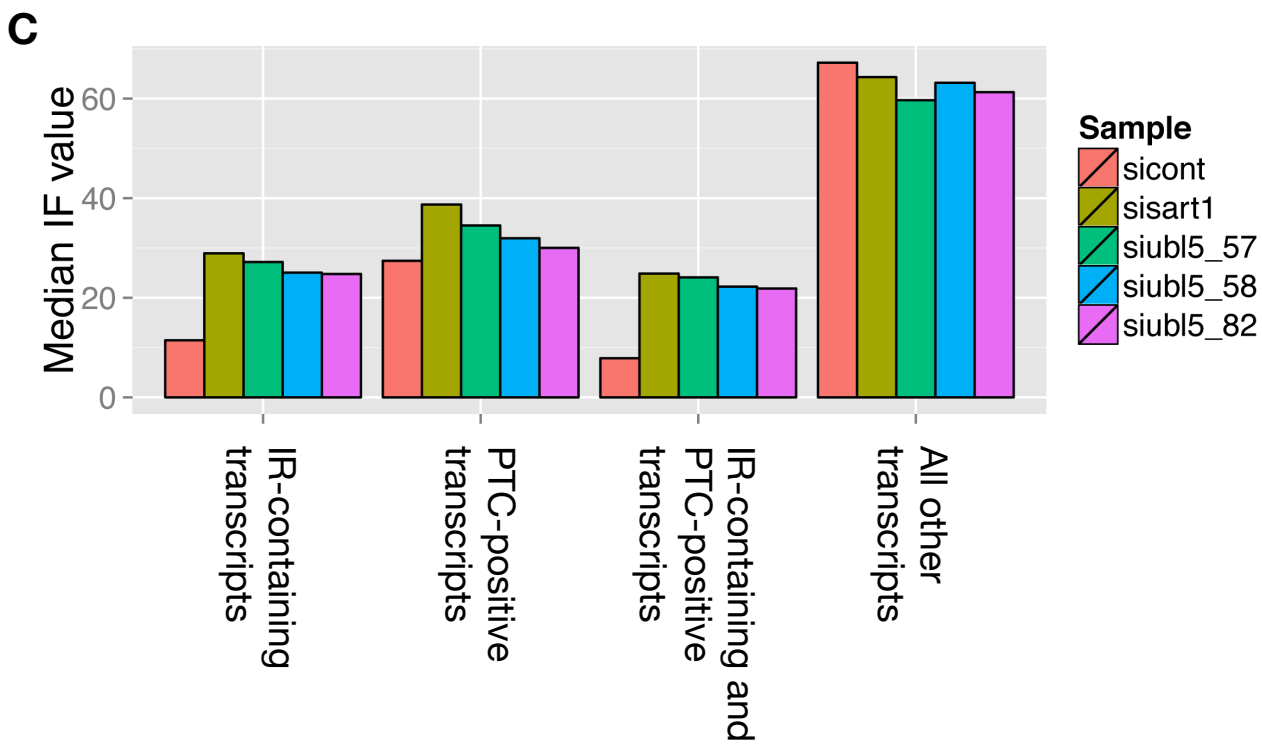

Supplement: embr0015-0956-sd3.pdf [file embr0015-0956-sd3.pdf]

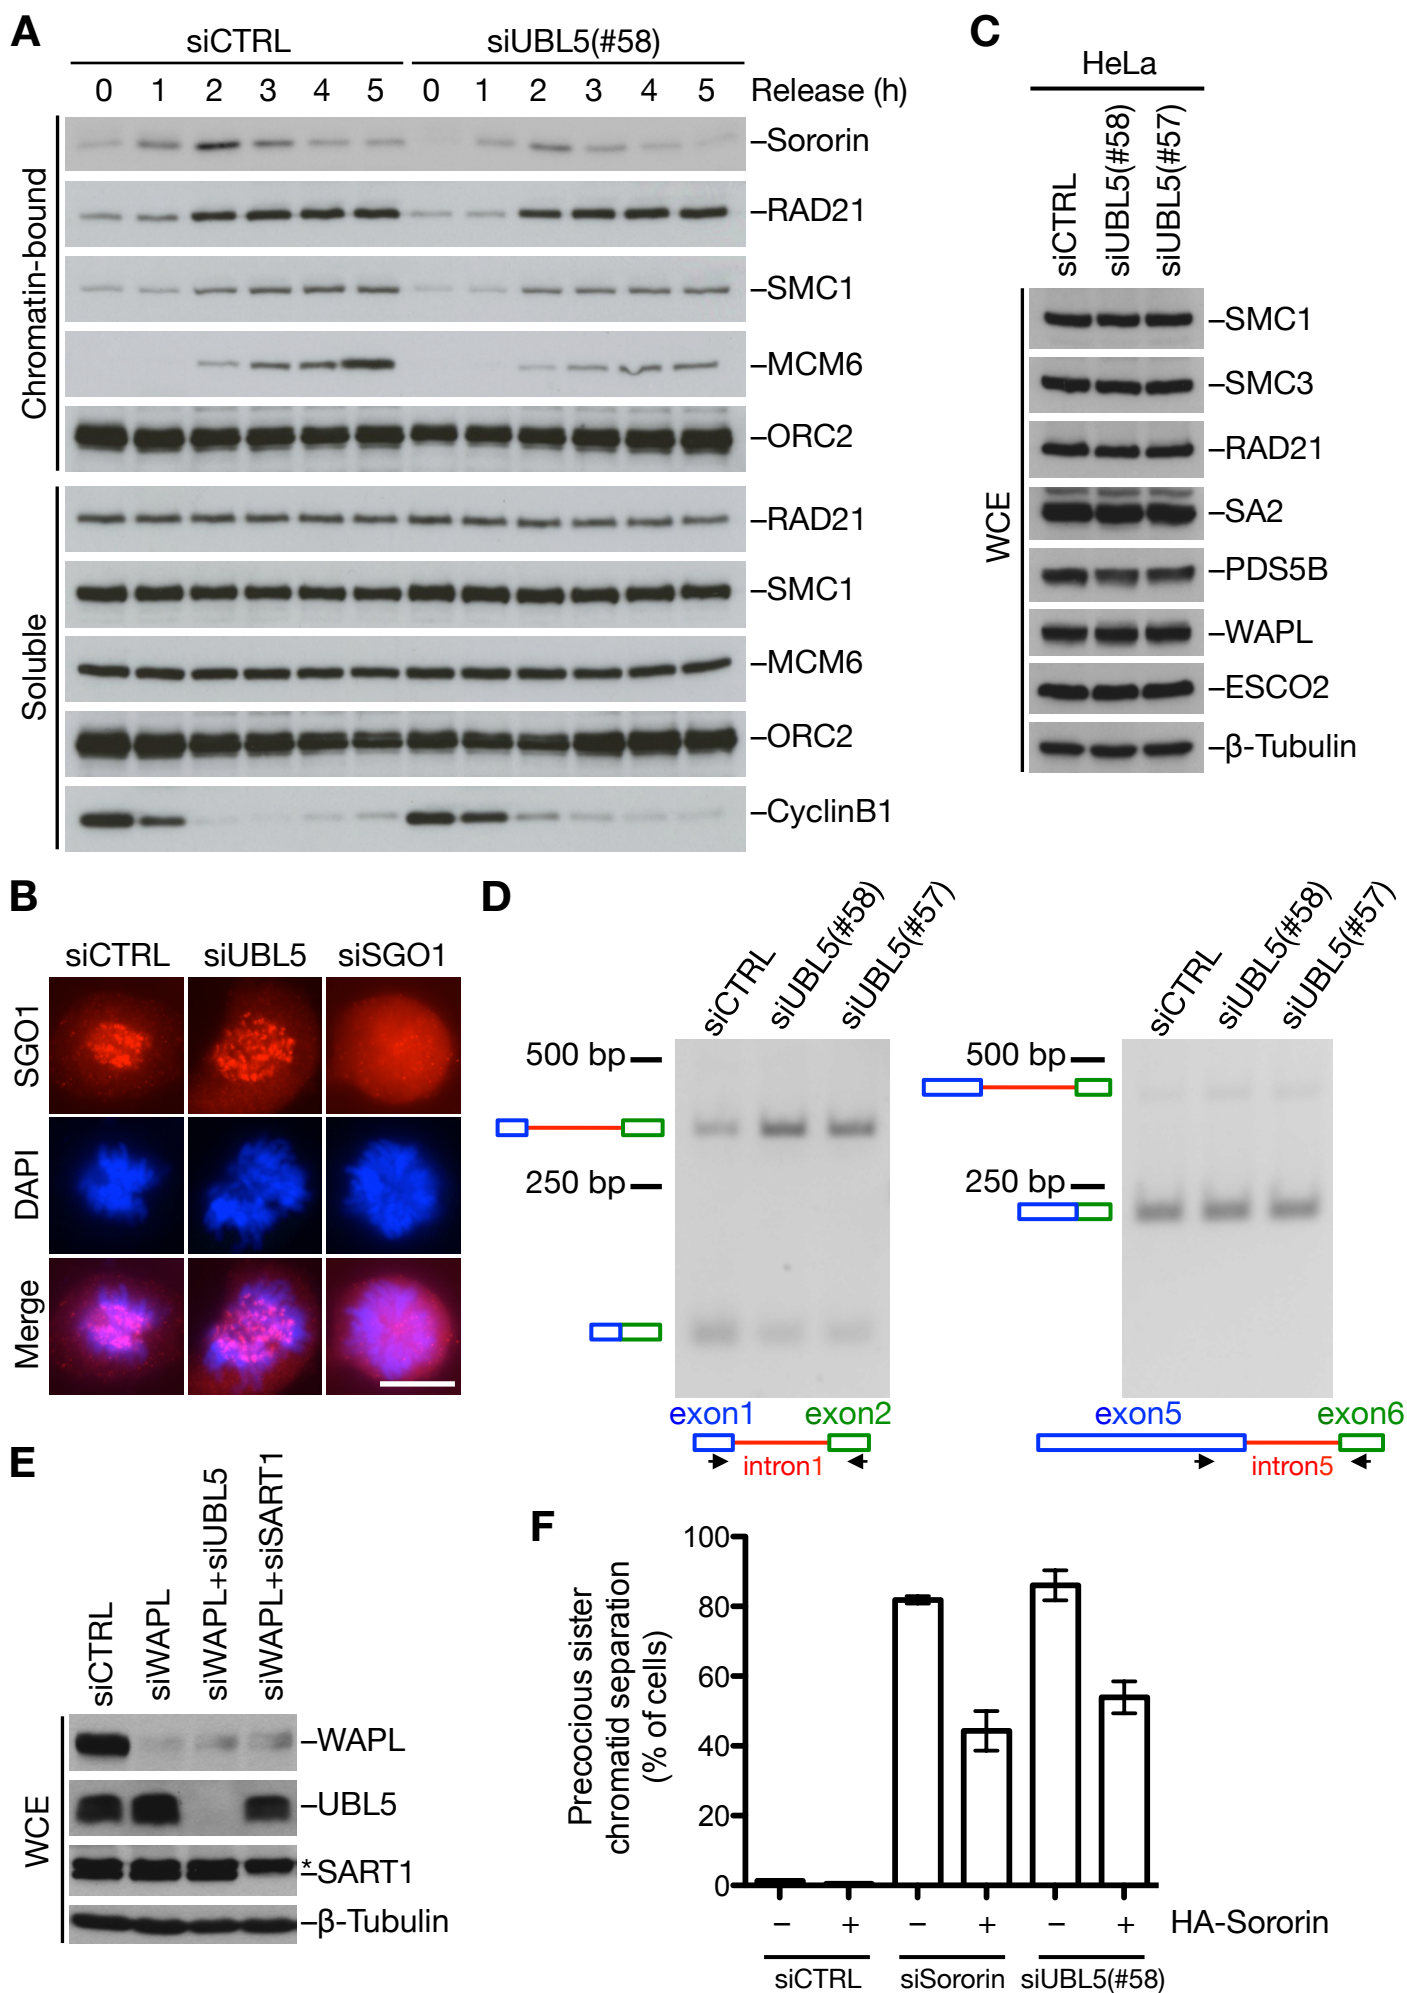

Supplement: embr0015-0956-sd5.pdf [file embr0015-0956-sd5.pdf]
